# Supplementary material
Source: PubMed Central journal article supplement (PMC4109766)

SFigure 1

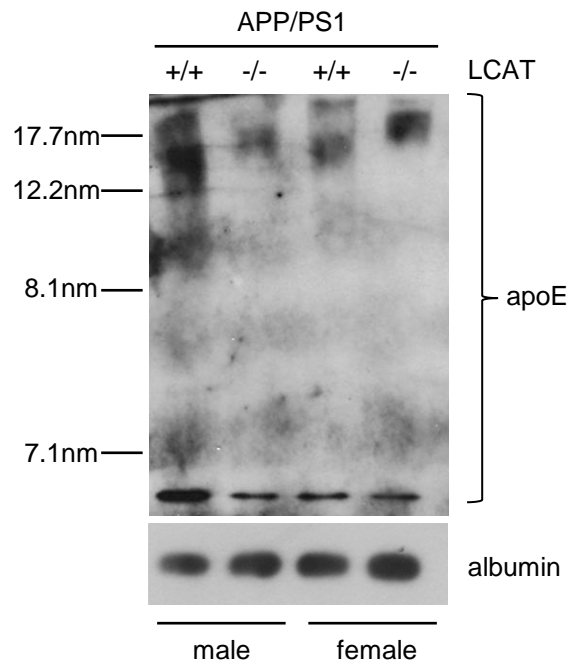

Supplement: supp_M049940_jlr.M049940-2.pdf [file supp_M049940_jlr.M049940-2.pdf]

SFigure 2

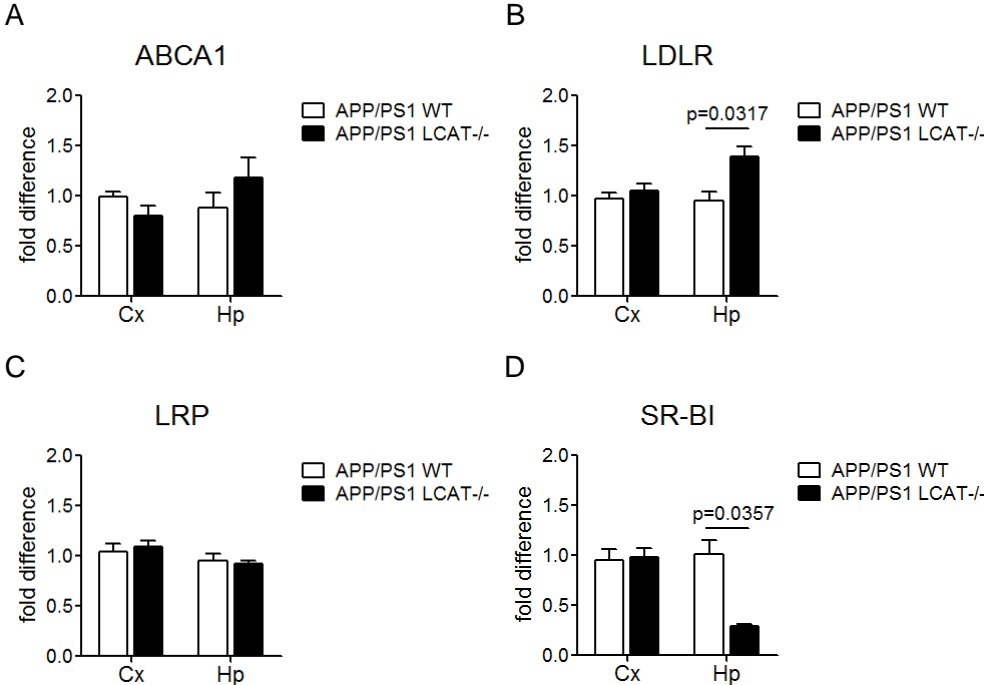

Supplement: supp_M049940_jlr.M049940-3.pdf [file supp_M049940_jlr.M049940-3.pdf]
